# Supplementary material
Source: Springer Nature journal article supplement (https://www.springermedizin.de/resource/supplementary/13041_2009_30_MOESM7_ESM.pdf/25657446)

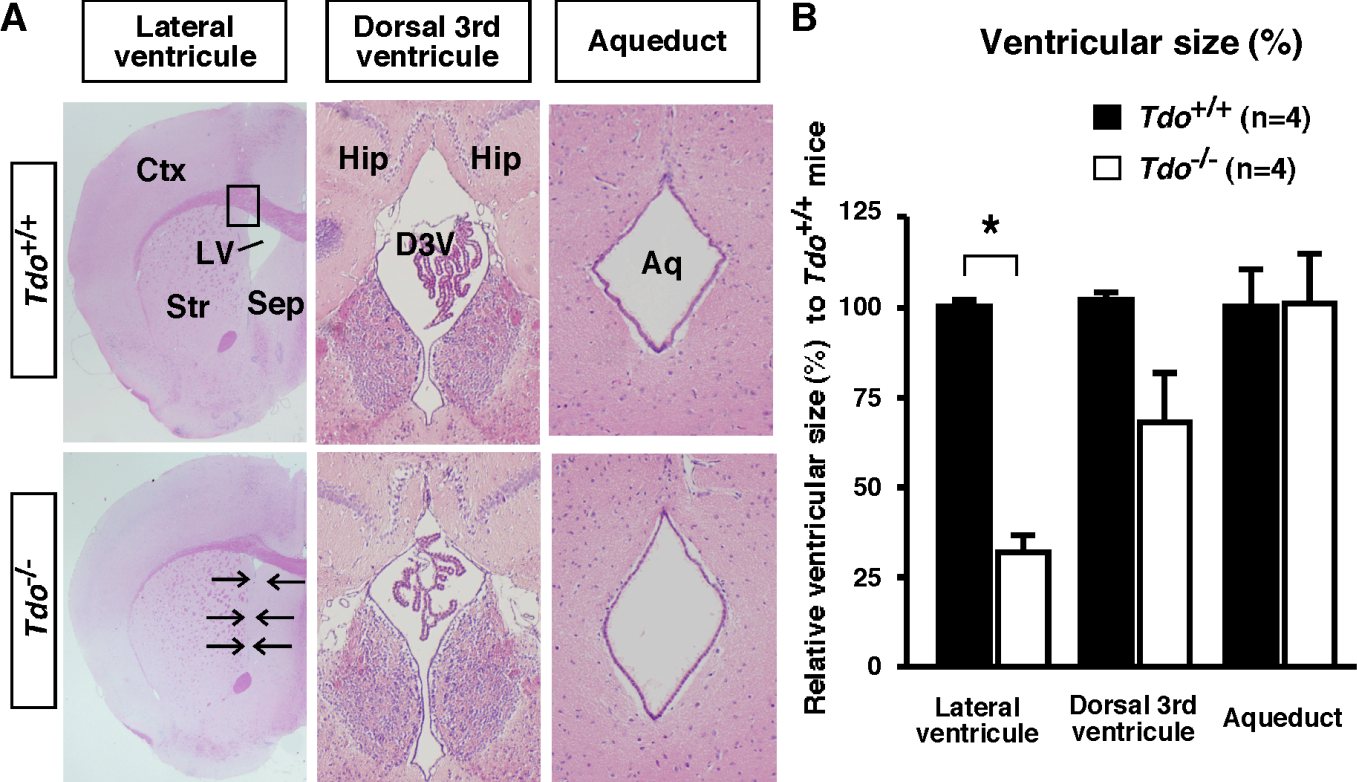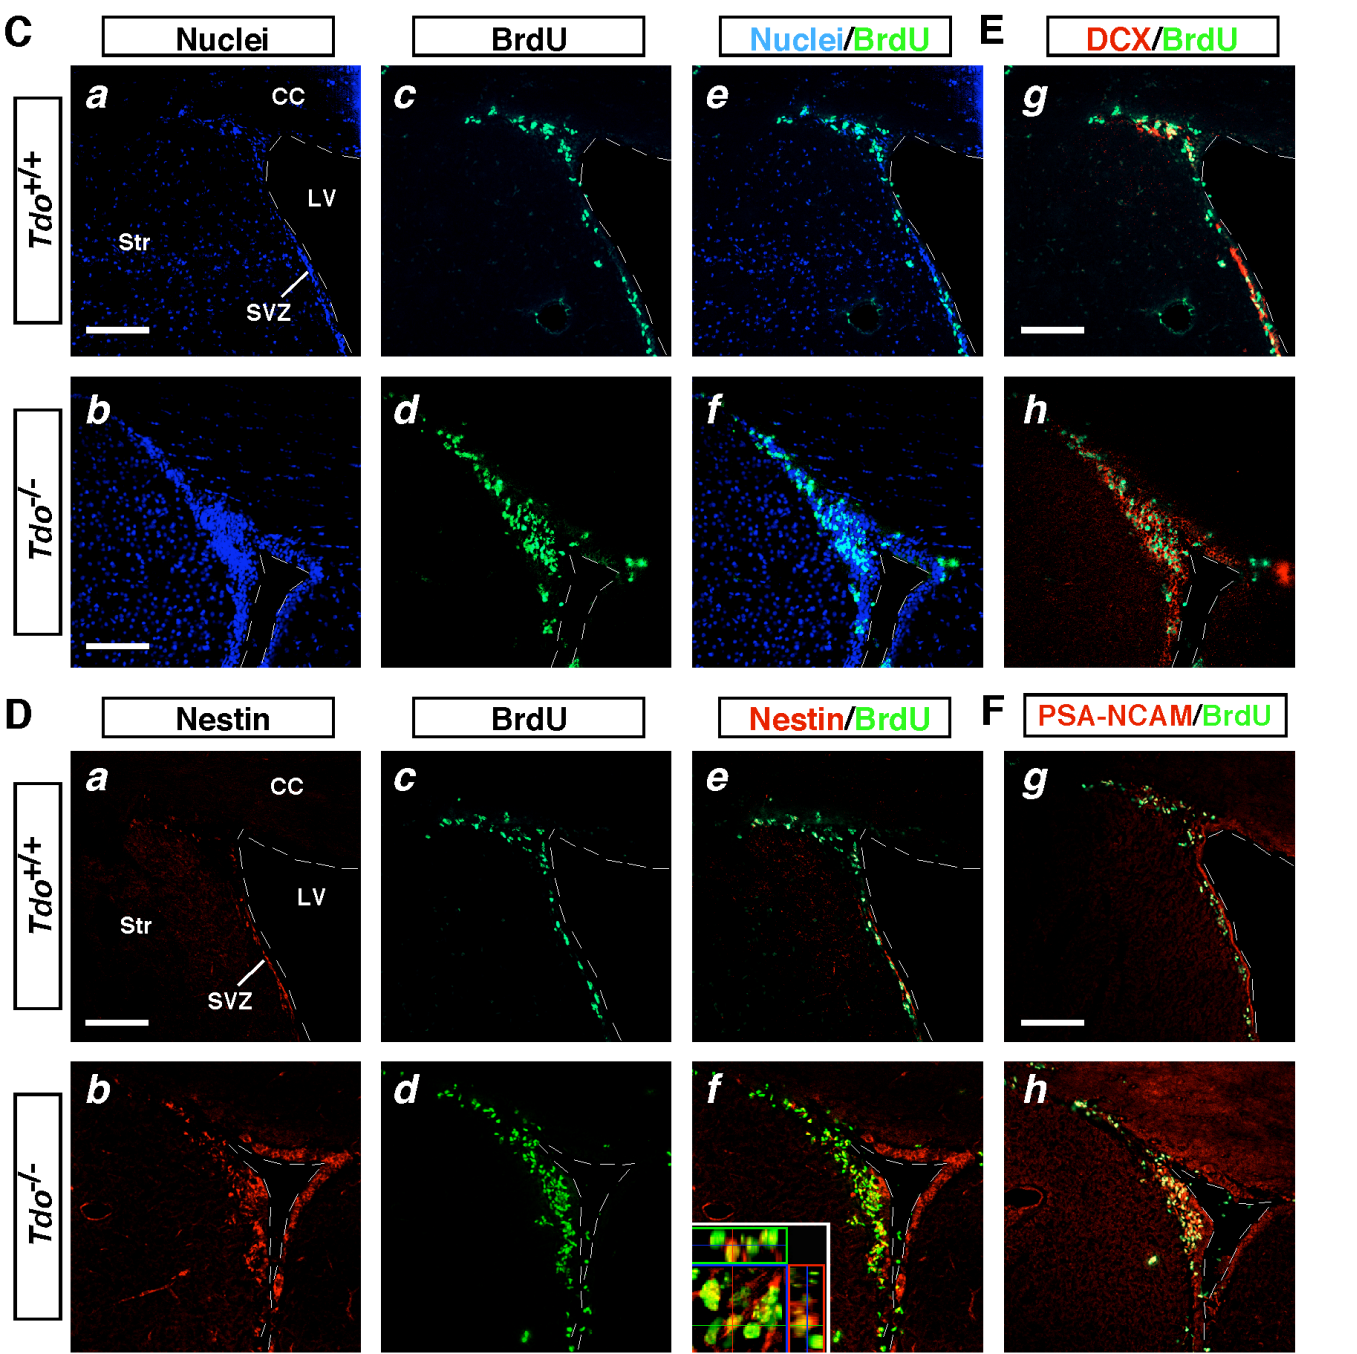

Supplement: MOESM7 [file 25657446]
